**[contig05715]**

AATGTCTGAATATGGAAAATTCGGTCCTCTAATTGGTGCCATTGACGAGGGCACCTCAAGTG  
CGCGATTCATTATTTTCAAAGCTAATTCCTCAGAAGTTGTAGCATATCACCAAAGGAGCTT  
GAGCAAATTTTTCCTCAAGAAGGATGGGTTGAACAAGATCCGAACGCAATTTTAGAGGTGGT  
TACGACATGCATACAGAAAGCAGTTGAGTCTTTGGTGTCAATTAGGAGGATCAGCAAGGATAT  
AATTGCTGTTGGTGTAACTAACCAAAGAGAGACAACAATAGTTTGGGACCGAAGCACAGGCA  
AACCTTTGCACAATGCAATTGTTTGGTTAGACATGAGAACTTCTTCAACTATTG

**[contig01119]**

TGCGAATTCGTCGCAAGTTTTGTTTGCGGAACCTTCTGCTATTTAATTCCATTTACTATTTA  
CCATTTTAAAAATAAATAATGGCAGAGAAAATACTGAAAAACCGAGTTTGCATTATCGGCTC  
TGGTAACTGGGGATCTGCAATTGCAAAGATTGTGGGTCGCAATGCTGCAAGACTGCCAAATT  
TCGAAGACAGAGTTACTATGTGGGTGTATGAAGAGATGATTGAAGGCAAGAAATTAACAGAG  
ATCATCAATGAGACCCATGAAAATGTAAAATATTTGCCTGGACATAAACTTCCTCCTAATGT  
GGTTGCCATTCCAGAGGTGGTTGATGCAGCGAAGGATGCCGACCTCCTTATTTTCGTAGTTC  
CCCACCAGTTTGTGAGAACTATTTGTTCTACACTCCTCGGGAAGATAAAGCCGACCGCAGCT  
GCACTTTCTTTGATAAAGGGCTTCGATATCGCGGAAGGCGGTGGCATTGACCTCATTTCTCA  
CATTATTACAAGGTGCCTCAAAATCCCATGTGCCGTATTAATGGGAGCTAACATTGCGTCTG  
AGGTGGCTGAAGAGAAATTTCTGTGAGACTACTATCGGATGCCGAGACGTGATGCTTGCACC  
ATGATGCGTGACATCATCAAACGGAATACTTTAGAGTAGTCGTTGTTGACGACGAAGATGC  
CGTGGAATTTGTGGAGCACTGAAGAACATTGTTGCTGTGGGAGCGGGTTTCGTAGACGGCC  
TTGGCTTTGGTGACAACACTAAAGCGGCTGTAATCCGTCTAGGTCTAATGGAAATGATCAA  
TTCGTCGATGTGTTCTACCCTGGCAGCAAGCTTAGCACTTTCTTCGAGTCTGCGGAGTGGC  
TGATCTCATTACAACCTGTTATGGTGGTAGGAACAGGAGGGTAGCTGAAGCCTTCGTTAAGA  
CTGGCAGGTCTATCAAAGAGCTAGAAGACGAGATGTTGAATGGCCAGAACTTCAAGGACCA  
ATCACCGCGGAAGAAGTCAACCACATGCTTGCCAACAAAAATATGGAGAACAAGTTCCCTCT  
GTTACCGCCGTGTTCCGCATCTGCCGAGGCGAGCTGAAGCCCAGCGACTTCATTAACTGCA  
TCCGCAGCCATCCAGAACACATG

**[GHYDZH02C854U]**

GTTGTATTTGTACCTGCCTTCAGTGGTTTTGTATGCACCGTATTGGCGCCAAGATGCTAGAGG  
TGTTATATGCGGAATCTCTGAGGATACAAATTCCAATCATATTGTAAAGGCTGCCCTCGAAG  
CTGTCTGTTTTCAAGTGCGGGATATACTCGATGCTATGAATGAAGACTGCGGTATTCCCTCTG  
CAATTGCTTAAGGTGGATGGTGGTATGACTTCTAATGCTTTAGTCATGCAAATGCAAGCTGA  
TTAATCGGAATCAACGTAATAAAGGCTGGATTTACTGAGAGTACCGCTTTAGGGGCTGCGC  
TCTGTGCCTATTGGGGAGTGGAGCCTTCTAAGCAAGGCTCTCCCATACCAATGACCAGTGGA  
ACAACATACACCTCTCTAATAACTGATGACGAAAGAGATATGCGGTACAAAACAGTGGAAGA  
TGGCCGTCGACCGATCTCTAGGATGGGAACAAAATAAGTACCTAATTATATC

**[GHYDZH02DD3DD]**

GTTGTATTTGTACCTGCCTTCAGTGGTTTTGTATGCACCGTATTGGCGCCAAGATGCTAGAGG  
TGTTATATGCGGAATCTCTGAGGATACAAATTCCAATCATATTGTAAAGGCTGCCCTCGAAG  
CTGTCTGTTTTCAAGTGCGGGATATACTCGATGCTATGAATGAAGACTGCGGTATTCCCTCTG  
CAATTGCTTAAGGTGGATGGTGGTATGACTTCTAATGCTTTAGTCATGCAAATGCAAGCTGA  
TTAATCGGAATCAACGTAATAAAGGCTGGATTTACTGAGAGTACCGCTTTAGGGGCTGCGC  
TCTGTGCCTATTGGGGAGTGGAGCCTTCTAAGCAAGGCTCTCCCATACCAATGACCAGTGGA

**Fig. S1.** Contigs and singletons used to construct the full ORF sequences of *SeGPDH1* and *SeGK1*.
